# Supplementary material for: Integrative analysis of miRNAs-mRNAs reveals that miR-182 up-regulation contributes to proliferation and invasion of nasopharyngeal carcinoma by targeting PTEN
Source: publisher site journal article supplement (doi:10.18632/aging.103316), 2020-06-15
Supplement: Supplementary file [file aging-v12i12-103316-supplementary-material-SD1.pdf]

**SUPPLEMENTARY FIGURE**

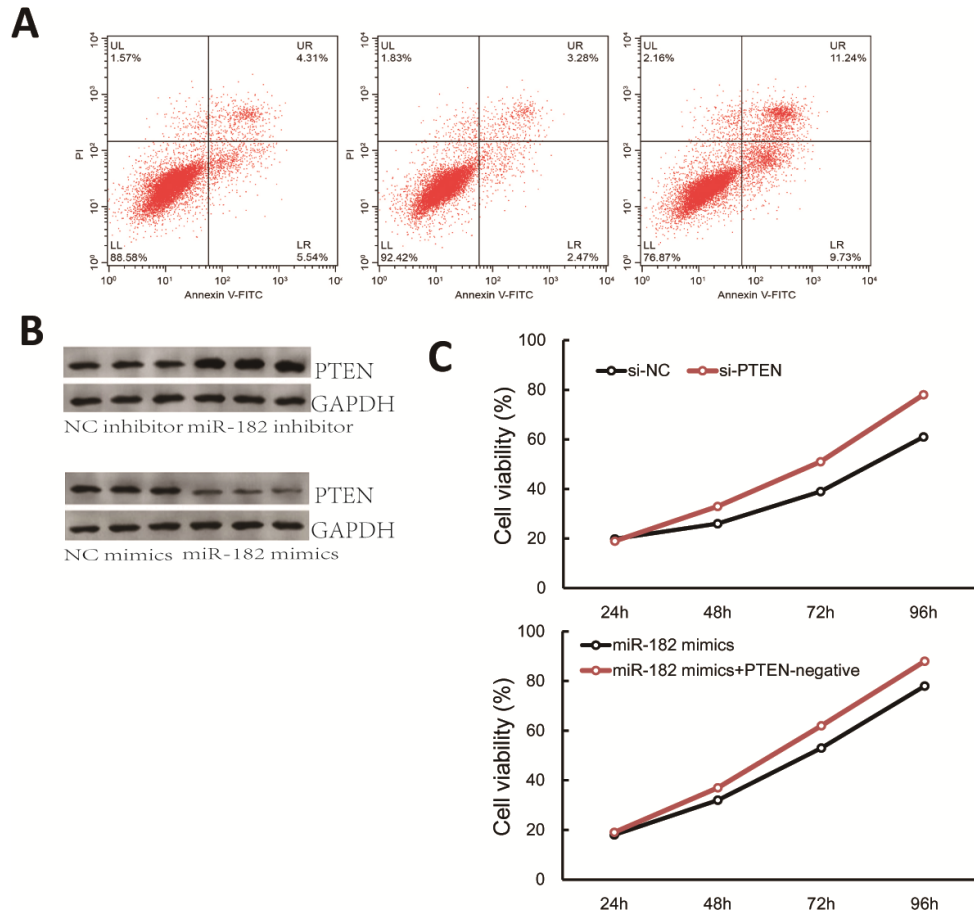

**Supplementary Figure 1. Molecular experiments.** (A) Cell apoptosis results indicated that apoptosis of NPC cells was significantly suppressed in miR-182 mimics condition and increased in miR-182 inhibitor condition; (B) Overexpression of miR-182 notably reduced expression of PTEN ( $P < 0.05$ ) while suppressed expression of miR-182 notably increased PTEN expression ( $P < 0.05$ ); (C) Transfection of miR-182 mimics into PTEN- depleted cells showed an increased proliferation of NPC cells compared to control.
