# Supplementary material for: Integrative analysis of miRNAs-mRNAs reveals that miR-182 up-regulation contributes to proliferation and invasion of nasopharyngeal carcinoma by targeting PTEN
Source: publisher site journal article supplement (doi:10.18632/aging.103316), 2020-06-15
Supplement: Supplementary file [file aging-v12i12-103316-supplementary-material-SD3.pdf]

## SUPPLEMENTARY TABLES

**Supplementary Table 2. Clinical information of NPC patients.**

| <b>Characteristics</b> |             |
|------------------------|-------------|
| Age, years             | 44.98±11.86 |
| BMI                    | 21±5.25     |
| Gender                 |             |
| Male, n (%)            | 73.5%       |
| Female, n (%)          | 26.5%       |
| T stage                |             |
| T1                     | 23.7%       |
| T2                     | 22.9%       |
| T3                     | 24.9%       |
| T4                     | 28.5%       |
| N stage                |             |
| N0                     | 9.0%        |
| N1                     | 31.5%       |
| N2                     | 46.3%       |
| N3                     | 13.2%       |

**Supplementary Table 3. Sample informations.**

| <b>Sample</b> | <b>Num. of Raw Reads</b> | <b>Clean Reads%</b> | <b>RemoveAdapter%</b> | <b>InsertNull%</b> | <b>N%</b> | <b>too_short%</b> | <b>Poly-A%</b> | <b>too_long%</b> | <b>low_quality%</b> |
|---------------|--------------------------|---------------------|-----------------------|--------------------|-----------|-------------------|----------------|------------------|---------------------|
| NPC1          | 11157702                 | 89.43%              | 0.03%                 | 0.42%              | 0.36%     | 5.37%             | 0.06%          | 3.15%            | 1.19%               |
| NPC2          | 11207287                 | 90.50%              | 0.05%                 | 0.29%              | 0.36%     | 4.78%             | 0.14%          | 2.77%            | 1.11%               |
| NPC3          | 10937374                 | 88.13%              | 0.04%                 | 0.51%              | 0.03%     | 6.80%             | 0.10%          | 3.82%            | 0.56%               |
| NPC4          | 10197246                 | 92.34%              | 0.03%                 | 0.27%              | 0.04%     | 3.55%             | 0.09%          | 2.99%            | 0.70%               |
| Control1      | 10956842                 | 94.61%              | 0.03%                 | 0.40%              | 0.03%     | 2.25%             | 0.09%          | 2.11%            | 0.48%               |
| Control2      | 12011555                 | 85.54%              | 0.05%                 | 0.53%              | 0.03%     | 6.51%             | 0.10%          | 6.52%            | 0.72%               |
| Control3      | 12203144                 | 88.40%              | 0.04%                 | 0.38%              | 0.13%     | 3.90%             | 0.13%          | 6.23%            | 0.79%               |
| Control4      | 11356664                 | 87.88%              | 0.04%                 | 0.28%              | 0.03%     | 3.74%             | 0.15%          | 7.25%            | 0.62%               |
