# Supplementary material for: Integrative analysis of miRNAs-mRNAs reveals that miR-182 up-regulation contributes to proliferation and invasion of nasopharyngeal carcinoma by targeting PTEN
Source: Aging (Albany NY). 2020 Jun 15;12(12):11568–78. doi: 10.18632/aging.103316 (PMC7343470; doi:10.18632/aging.103316)
Supplement: Supplementary Table 1 [file aging-12-103316-s001..xlsx]

## Sheet: Sheet1
Supplementary Table 1. MiRNAs-mRNAs interactions.
Source	Target
hsa-miR-4649-3p	KCNS3
hsa-miR-4649-3p	MMP11
hsa-miR-4649-3p	LTBP3
hsa-miR-4649-3p	MACC1
hsa-miR-4649-3p	MTMR11
hsa-miR-4649-3p	CDH4
hsa-miR-4649-3p	FRMD5
hsa-miR-4649-3p	GMNC
hsa-miR-1183	ABR
hsa-miR-1183	ADAMTS17
hsa-miR-1183	CDCP1
hsa-miR-1183	CORO2A
hsa-miR-1183	ADORA1
hsa-miR-1183	CLDN1
hsa-miR-1183	CLEC12B
hsa-miR-1183	COG6
hsa-miR-1183	IFIT2
hsa-miR-1183	LZTS1
hsa-miR-1183	MGAT3
hsa-miR-1183	MISP
hsa-miR-1183	PKD2L1
hsa-miR-1183	PLEKHG1
hsa-miR-1183	RUNX1
hsa-miR-1183	SERPINA1
hsa-miR-1183	SFN
hsa-miR-1183	TRIM47
hsa-miR-36	ADAMTS14
hsa-miR-36	CST1
hsa-miR-36	CST2
hsa-miR-36	DCBLD2
hsa-miR-36	MOCOS
hsa-miR-36	PCDHAC1
hsa-miR-36	PTCHD4
hsa-miR-36	SLC24A2
hsa-miR-36	SYT8
hsa-miR-36	TMEM233
hsa-miR-1185-5p	PTEN
hsa-miR-1185-5p	ERBB4
hsa-miR-1185-5p	FRMPD3
hsa-miR-1185-5p	GLIPR1L2
hsa-miR-1185-5p	MPP2
hsa-miR-132-5p	MCEMP1
hsa-miR-132-5p	MOCOS
hsa-miR-132-5p	NUDT16
hsa-miR-132-5p	CNKSR3
hsa-miR-132-5p	SOX5
hsa-miR-132-5p	MPP2
hsa-miR-132-5p	YTHDC1
hsa-miR-452	ADORA1
hsa-miR-452	PI4K2A
hsa-miR-452	TNFRSF10C
hsa-miR-452	UPP1
hsa-miR-455-3p	TNK1
hsa-miR-455-3p	ZG16B
hsa-miR-455-3p	GRHL1
hsa-miR-455-3p	HAPLN1
hsa-miR-455-3p	FAM84A
hsa-miR-455-3p	PRICKLE1
hsa-miR-455-3p	TMEM100
hsa-miR-182-5p	ANKFY1
hsa-miR-182-5p	C10orf55
hsa-miR-182-5p	CDH4
hsa-miR-182-5p	COL6A6
hsa-miR-182-5p	FUT3
hsa-miR-182-5p	GRIN1
hsa-miR-182-5p	ANKH
hsa-miR-182-5p	CASP14
hsa-miR-182-5p	CFAP74
hsa-miR-182-5p	CTNS
hsa-miR-182-5p	EFCAB11
hsa-miR-182-5p	EIF2B2
hsa-miR-182-5p	FAM110C
hsa-miR-182-5p	HOMER2
hsa-miR-182-5p	MTHFS
hsa-miR-182-5p	NOS1
hsa-miR-182-5p	IGF2R
hsa-miR-182-5p	LZTS1
hsa-miR-182-5p	MGAT3
hsa-miR-182-5p	MMP11
hsa-miR-182-5p	PSG8
hsa-miR-182-5p	SERPINA1
hsa-miR-182-5p	SFN
hsa-miR-182-5p	SLC24A2
hsa-miR-182-5p	SLC34A2
hsa-miR-182-5p	TNFAIP6
hsa-miR-182-5p	TTL
hsa-miR-182-5p	UNC5B
hsa-miR-182-5p	DPY19L2
hsa-miR-182-5p	FDX1
hsa-miR-182-5p	HYKK
hsa-miR-182-5p	TMEM67
hsa-miR-182-5p	AGBL4
hsa-miR-182-5p	PTEN
hsa-miR-182-5p	ANKRD18B
hsa-miR-182-5p	CDC14B
hsa-miR-182-5p	DCBLD2
hsa-miR-182-5p	DOCK9
hsa-miR-182-5p	ENTPD1
hsa-miR-182-5p	EPS8
hsa-miR-182-5p	FAM84A
hsa-miR-182-5p	FBXO36
hsa-miR-182-5p	FDX1
hsa-miR-182-5p	FZD5
hsa-miR-182-5p	KIAA1324
hsa-miR-182-5p	KIF6
hsa-miR-182-5p	MATN2
hsa-miR-182-5p	NFIA
hsa-miR-182-5p	PLA2R1
hsa-miR-182-5p	PXMP4
hsa-miR-182-5p	SDPR
hsa-miR-182-5p	YTHDC1
hsa-miR-182-5p	ZNF280B
hsa-miR-92a-3p	PTEN
hsa-miR-92a-3p	CREB1
hsa-miR-92a-3p	DHH
hsa-miR-92a-3p	TYK2
hsa-miR-92a-3p	HEXA
hsa-miR-92a-3p	ITPR2
hsa-miR-92a-3p	PLEKHO2
hsa-miR-92a-3p	ANK3
hsa-miR-431	ANK3
hsa-miR-431	GNA14
hsa-miR-431	NFIA
hsa-miR-431	IGSF1
hsa-miR-431	NAT8L
hsa-miR-431	SCEL
hsa-miR-431	SLC25A48
hsa-miR-431	TTC39A
hsa-miR-1234-5p	SLC25A42
hsa-miR-1234-5p	TGM2
hsa-miR-1234-5p	YTHDF1
hsa-miR-1234-5p	TNKS1BP1
hsa-miR-1234-5p	TCAIM
hsa-miR-32-3p	ALDH7A1
hsa-miR-32-3p	AP4S1
hsa-miR-32-3p	CHRNA7
hsa-miR-32-3p	DZANK1
hsa-miR-32-3p	FAM13A
hsa-miR-32-3p	NUDT16
hsa-miR-32-3p	PLEKHH1
hsa-miR-32-3p	SPATA2
hsa-miR-32-3p	MEIS1
hsa-miR-32-3p	ADGRL1
hsa-miR-32-3p	TMEM56
hsa-miR-32-3p	SLC39A3
hsa-miR-32-3p	TNKS1BP1
hsa-miR-32-3p	FAM180B
hsa-miR-32-3p	NPFFR1
hsa-miR-32-3p	KDM2B
hsa-miR-32-3p	C4orf50
hsa-miR-32-3p	XKR4
hsa-miR-32-3p	SIRT5
hsa-miR-32-3p	TUB
hsa-miR-212	PSD2
hsa-miR-212	UBA52
hsa-miR-212	NPHP4
hsa-miR-212	PDE1C
hsa-miR-212	PCDH12
hsa-miR-212	KIAA1191
hsa-miR-212	GPR158
hsa-miR-212	NOS1AP
hsa-miR-212	ACAD9
hsa-miR-212	POC1B-GALNT4
hsa-miR-212	C6orf132
hsa-miR-212	INTU
hsa-miR-212	MAVS
hsa-miR-212	SLC24A3
hsa-miR-34c-5p	IFNA17
hsa-miR-34c-5p	IFNA4
hsa-miR-34c-5p	DCAF11
hsa-miR-34c-5p	CAMK1D
hsa-miR-34c-5p	DDX25
hsa-miR-34c-5p	DNASE1L3
hsa-miR-34c-5p	SCN4B
hsa-miR-34c-5p	CNKSR3
hsa-miR-34c-5p	SLC4A4
hsa-miR-34c-5p	BTN3A3
hsa-miR-34c-5p	MMAB
hsa-miR-34c-5p	MGST2
hsa-miR-34c-5p	OGFRL1
hsa-miR-34c-5p	PPP1R36
hsa-miR-34c-5p	ELK4
hsa-miR-34c-5p	PANK3
hsa-miR-34c-5p	KCTD10
hsa-miR-34c-5p	CDH6
hsa-miR-34c-5p	FERMT1
hsa-miR-34c-5p	ATP11A
hsa-miR-34c-5p	SLC9A7
hsa-miR-34c-5p	TRMT61A
hsa-miR-34c-5p	HACD2
hsa-miR-34c-5p	ZNF709
hsa-miR-4478	NT5E
hsa-miR-4478	PSD3
hsa-miR-4478	CTNND2
hsa-miR-4478	SLC24A4
hsa-miR-4478	BCAP29
hsa-miR-4478	LTB4R
hsa-miR-4478	ZC3H12D
hsa-miR-4478	RBM15B
hsa-miR-4478	CHD3
hsa-miR-4478	TMEM63B
hsa-miR-4478	TRIM7
hsa-miR-4478	ADAMTS18
hsa-miR-4478	CABP2
hsa-miR-4478	CAPN8
hsa-miR-4478	CDC42BPG
hsa-miR-4478	CDCP1
hsa-miR-4478	CDH4
hsa-miR-455-3p	CDH6
hsa-miR-455-3p	CLEC12B
hsa-miR-455-3p	CNIH2
hsa-miR-455-3p	COL1A1
hsa-miR-455-3p	COL5A1
hsa-miR-455-3p	COL6A6
hsa-miR-455-3p	FAXC
hsa-miR-455-3p	GALNT5
hsa-miR-455-3p	IL1RN
hsa-miR-455-3p	LZTS1
hsa-miR-455-3p	MOCOS
hsa-miR-455-3p	PAQR4
hsa-miR-455-3p	RYR1
hsa-miR-455-3p	SFN
hsa-miR-455-3p	SLC24A2
hsa-miR-455-3p	TGM2
hsa-miR-455-3p	TNFRSF10C
hsa-miR-455-3p	CNTN4
hsa-miR-455-3p	C12orf76
hsa-miR-455-3p	ORAI3
hsa-miR-455-3p	SH3BGRL2
hsa-miR-455-3p	FAM222A
hsa-miR-455-3p	SLC6A2
hsa-miR-455-3p	RNF157
hsa-miR-455-3p	MGRN1
hsa-miR-455-3p	ASTN1
hsa-miR-455-3p	APLNR
hsa-miR-455-3p	PLEKHM3
hsa-miR-455-3p	DCTN3
hsa-miR-455-3p	RFPL2
hsa-miR-455-3p	TTL
hsa-miR-455-3p	TUBB3
hsa-miR-4478	ANKRD46
hsa-miR-4478	KCNIP3
hsa-miR-4478	NUDT16
hsa-miR-4478	SLC38A3
hsa-miR-4478	ANK3
hsa-miR-4478	CHRNA7
hsa-miR-4478	ZNF709
hsa-miR-4478	FAM167A
hsa-miR-4478	HLF
hsa-miR-4478	HYKK
hsa-miR-4478	LRTOMT
hsa-miR-4478	PLEKHG4B
hsa-miR-4478	SDK2
hsa-miR-4478	SLC26A4
hsa-miR-4478	ZNF396
hsa-miR-339-5p	RIMKLA
hsa-miR-339-5p	NLRX1
hsa-miR-339-5p	NT5DC3
hsa-miR-339-5p	FMN1
hsa-miR-339-5p	PCYT2
hsa-miR-339-5p	SERF2
hsa-miR-339-5p	SKAP2
hsa-miR-339-5p	IQCH
hsa-miR-339-5p	SLC2A12
hsa-miR-339-5p	SOX5
hsa-miR-339-5p	STXBP5L
hsa-miR-450a-3p	CDKN1A
hsa-miR-450a-3p	METTL14
hsa-miR-450a-3p	DGKI
hsa-miR-450a-3p	FBXO40
hsa-miR-450a-3p	SYP
hsa-miR-450a-3p	MEIS2
hsa-miR-450a-3p	SYT8
hsa-miR-450a-3p	TTC39A
hsa-miR-185-3p	AAK1
hsa-miR-185-3p	AP4S1
hsa-miR-185-3p	BCAP29
hsa-miR-185-3p	CASZ1
hsa-miR-185-3p	CNKSR3
hsa-miR-185-3p	COL27A1
hsa-miR-185-3p	DPY19L2
hsa-miR-185-3p	EMCN
hsa-miR-185-3p	ERBB4
hsa-miR-185-3p	ESRRG
hsa-miR-185-3p	KCTD16
hsa-miR-185-3p	LIPG
hsa-miR-185-3p	LRTOMT
hsa-miR-185-3p	LSM3
hsa-miR-185-3p	MOK
hsa-miR-185-3p	NPR3
hsa-miR-185-3p	PLEKHG4B
hsa-miR-185-3p	STXBP5L
hsa-miR-185-3p	TPPP
hsa-miR-185-3p	TTYH2
hsa-miR-185-3p	TUB
hsa-miR-185-3p	VANGL1
hsa-miR-185-3p	VIPR1
